# Supplementary material
Source: PubMed Central journal article supplement (PMC2603557)
Supplement: 90464.2008_4.pdf [file 90464.2008_4.pdf]

Table S1: Sequences of qPCR Primers

| Gene          | Forward (5'→3')          | Reverse (5'→3')            |
|---------------|--------------------------|----------------------------|
| ACAD-L        | TCTTTCCTCGGAGCATGACA     | GACCTCTCTACTCACTTCTCCAG    |
| ACAD-M        | AAGCCACGAAGTATGCCCTG     | CCATAGCCTCCGAAAATCTG       |
| ACC           | TGAGGAGGACCGCATTATC      | GCATGGAATGGCAGTAAGGT       |
| Aconitase     | TCTCTAACCAACCTGCTCATCGG  | TCATCTCCAATCACCACCCACC     |
| ADH1          | ACAAACCCTTCACCATCGAG     | CCTTCTCCAACGCTCTCAAC       |
| Adiponectin   | TGTTGGAATGACAGGAGCTG     | CGAATGGGTACATTGGGAAC       |
| COX 8b        | GAACCATGAAGCCAACGACT     | GCGAAGTTCACAGTGGTTCC       |
| COX II        | TCTCCCCTCTCTACGCATTCTA   | ACGGATTGGAAGTTCTATTGGC     |
| CPT-1 $\beta$ | GATCTGGGCTATCTGTGTCCG    | ACGTTTGGAAGCTGTAGAGCATG    |
| CRBP-I        | GCTGAGCACTTTTCGGAACT     | CCCTCAGCTCTCATTTCCAG       |
| CYC           | ATTTCAACCCTTACTTTCCCG    | CCACTTATGCCGCTTCATGGC      |
| Cyclophilin   | CAAGACTGAATGGCTGGATG     | ATGGGGTAGGGACGCTCTCC       |
| FAS           | TACTCAGCAGAAGATGTGCGG    | TTTGCCAAGGAGGTGCGAAC       |
| G6P           | TGCAAGGGAGAACTCAGCAA     | GGACCAAGGAAGCCACAATG       |
| GLUT2         | ACGGATGCCAATTACCGACA     | TGCTGGGCCATGTGCA           |
| Lpl           | TCTGTACGGCACAGTGG        | CCTCTCGATGACGAAGC          |
| MGL           | CAGAGAGGCCAACCTACTTTTC   | ATGCGCCCCAAGGTCATATTT      |
| PEPCK         | TTGAACTGACAGACTCGCCCT    | TGCCCATCCGAGTCATGA         |
| PPAR $\alpha$ | GACAAGGCCTCAGGGTACCA     | GCCGAATAGTTCGCCGAAA        |
| PPAR $\gamma$ | AACTCTGGGAGATTCTCCTGTTGA | TGGTAATTTCTTGTGAAGTGCTCATA |
| RALDH1        | TTTGGCCACACACTCCAATA     | GGGCTGACAAGATTCATGGT       |
| RBP4          | TCTGTGGACGAGAAGGGTCAT    | CCAGTTGCTCAGAAGACGGAC      |
| RetSDR1       | CCAAAGCTGTCCGAGAGAAG     | CAATATGGCCGTTCTGGAGT       |
| SCD-1         | CTACAAGCCTGGCCTCCTGC     | GGACCCCAGGGAAACCAGGA       |
| SREBP-1c      | GCAGACTCACTGCTGCTGAC     | AGGTACTGTGGCCAAGATGG       |
| TGM2          | ACAGCATCCCACTTCGAATC     | CTTGATTTCCGGATTCTCCA       |
| UCP-1         | CAGAATGCAAGCCCAGAGC      | AAGCATTGTAGGTCCCCGTGT      |

Table S2: Expression levels of genes in soleus muscle in wild-type (WT) and C-III-KO mice after being fed a high fat diet.

| Gene          | WT              | C-III-KO        |      |
|---------------|-----------------|-----------------|------|
| CPT-1 $\beta$ | 0.89 $\pm$ 0.31 | 0.80 $\pm$ 0.16 | n.d. |
| PPAR $\alpha$ | 0.48 $\pm$ 0.19 | 0.48 $\pm$ 0.19 | n.d. |
| PGC1 $\alpha$ | 0.46 $\pm$ 0.15 | 0.46 $\pm$ 0.11 | n.d. |
| ACAD-M        | 0.43 $\pm$ 0.12 | 0.46 $\pm$ 0.10 | n.d. |
| ACAD-L        | 0.83 $\pm$ 0.20 | 0.78 $\pm$ 0.15 | n.d. |

Gene expression is presented as relative expression level (mean $\pm$ SEM). n=4 each genotype; n.d., not different. CPT-1 $\beta$ , Carnitine palmitoyltransferase-1 $\beta$ ; PPAR $\alpha$ , peroxisome proliferator-activated receptor alpha; PGC1 $\alpha$ , PPAR $\gamma$  coactivator 1 $\alpha$ ; ACAD, acyl-Coenzyme A dehydrogenase (M-medium; L-long).

### Online Supplementary Data

#### Figure Legends for supplementary figures

**Fig. S1.** CRBP-III expression is regulated by PPAR $\gamma$ . **(A)** Luciferase assays using different CRBP-III promoter constructs transfected into COS7 cells. Cells were co-transfected with expression vectors for PPAR $\gamma$  and RXR $\alpha$ . Relative luciferase activity was assessed after treatment with vehicle (dark bar) or rosiglitazone (light bar). **(B)** The protein-DNA complex for PPRE1 and PPRE3 can be supershifted (light arrow) using specific antibodies against PPAR $\gamma$  or RXR $\alpha$ . aP2-PPRE was used as a positive control.

#### Fig S2

CRBP-III is not expressed in the brain. Northern Blot Analysis of different regions of the brain. Top panel shows lack of expression of CRBP-III; bottom panel shows the ethidium stained RNA gel as loading control. 1, liver, 2, whole brain; 3, cerebral cortex; 4, basal ganglia; 5, hippocampus; 6, hypothalamus; 7, cerebellum; 8, brain stem.

#### Fig. S3

CRBP-III is expressed in brown adipose tissue (BAT). Expression of CRBP-III in BAT was analyzed in protein extracts from total BAT (whole), BAT stromal vascular fraction (SVF), BAT adipocytes (ADIPO) and white adipose tissue (WAT) as comparison. 75  $\mu$ g protein was loaded for each sample.
