# Supplementary material
Source: PubMed Central journal article supplement (PMC2603557)

# Supplementary Figure S1

S1A

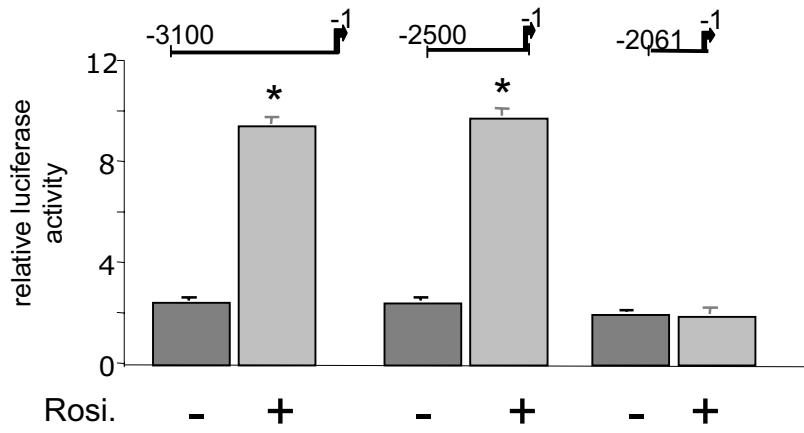

S1B

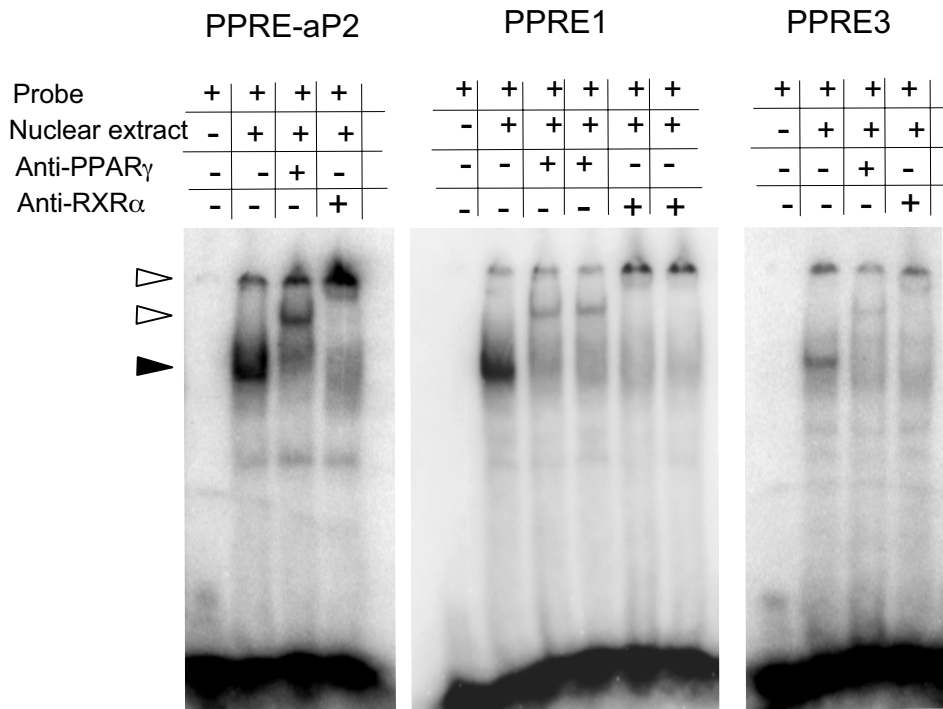

Supplement: 90464.2008_1.pdf [file 90464.2008_1.pdf]

## Supplemental Figure S2

S2

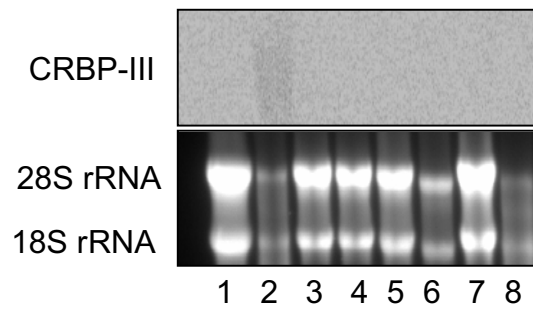

Supplement: 90464.2008_2.pdf [file 90464.2008_2.pdf]

### Supplemental Figure 3

S3

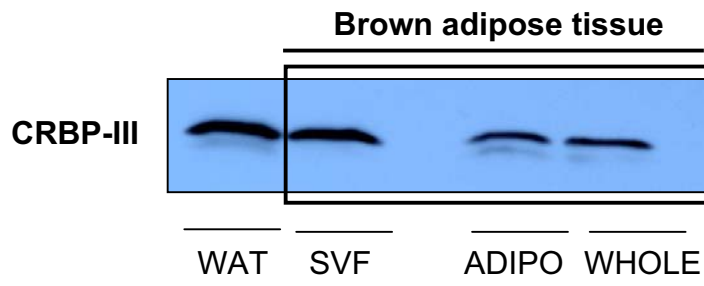

Supplement: 90464.2008_3.pdf [file 90464.2008_3.pdf]
